# Supplementary material for: Engineered K1F bacteriophages kill intracellular Escherichia coli K1 in human epithelial cells
Source: PubMed Central journal article supplement (PMC6277420; doi:10.1038/s41598-018-35859-6), 2018-12-03
Supplement: 41598_2018_35859_MOESM2_ESM.pdf [file 41598_2018_35859_MOESM2_ESM.pdf]

## Supplementary Information

### **Engineered K1F bacteriophages kill intracellular *Escherichia coli* K1 in human epithelial cells**

Christian Moeller-Olsen<sup>1</sup>, Siu Fung Stanley Ho<sup>1</sup>, Ranti Dev Shukla<sup>2</sup>, Tamas Feher<sup>2</sup> and Antonia P. Sagona\*<sup>1</sup>

\*Corresponding author, Antonia P. Sagona: [A.Sagona@warwick.ac.uk](mailto:A.Sagona@warwick.ac.uk)

1. School of Life Sciences, University of Warwick, Gibbet Hill Road CV4 7AL, Coventry, UK
2. Synthetic and Systems Biology Unit, Biological Research Centre of the Hungarian Academy of Sciences, Hungary

**Table S1. Sequences of synthetic donor DNA cassettes**

| Plasmid | Donor DNA cassette                                                                                                                                                                                                                                                                                                                                                                                                                                                                                                                                                                                                                                                                                                                                                                                                                                                                                                                                                                                                                                                                                                                                                                                                         |
|---------|----------------------------------------------------------------------------------------------------------------------------------------------------------------------------------------------------------------------------------------------------------------------------------------------------------------------------------------------------------------------------------------------------------------------------------------------------------------------------------------------------------------------------------------------------------------------------------------------------------------------------------------------------------------------------------------------------------------------------------------------------------------------------------------------------------------------------------------------------------------------------------------------------------------------------------------------------------------------------------------------------------------------------------------------------------------------------------------------------------------------------------------------------------------------------------------------------------------------------|
| pSBGFP  | <p>gaattcgcggccgcttctagagGctgtgggtactgtgaagctgcgtgatttggcgctggaacgtgaccgtgacgtagatgct<br/> cagggtgacctgattgtcggtaaatacgcctatgggccacggtggtctgcgtccagaagcagcaggcgcaactggttttcagcc<br/> cagcggagATGCGTAAAGGCGAAGAGCTGTTCACCTGGTGTCTGCCCTATTCTGGTGGAACTGGATGGTGTGTCACCGTCA<br/> TAAGTTTTCCGTGCGTGGCGAGGGTGAAGGTGACGCAACTAATGGTAAACTGACGCTGAAGTTCATCTGTACTACTGGTAAA<br/> CTGCCGGTACCTTGCCGACTCTGGTAACGACGCTGACTTATGGTGTTCAGTGTCTTGTCTGTTATCCGGACCATATGAAGC<br/> AGCATGACTTCTTCAAGTCCGCCATGCCGGAAGGCTATGTGCAGGAACGCACGATTTCTTTAAGGATGACGGCAGCTACAA<br/> AACGCGTGCAGAAAGTAAAATTTGAAGGCGATACCCTGGTAAACCGCATTGAGCTGAAAGGCATTGACTTTAAAGAAGACGGC<br/> AATATCTGGGCCATAAGCTGGAATACAATTTTAACAGCCACAATGTTTACATCACCGCCGATAAACAAAAAATGGCATT<br/> AAGCGAATTTTAAAATTCGCCACAACGTGGAGGATGGCAGCGTGCAGCTGGCTGATCACTACCAGCAAAACTCCAATCGG<br/> TGATGGTCTGTCTGCTGCCAGACAATCACTATCTGAGCAGCAAAGCGTTCTGTCTAAAGATCCGAACGAGAAACGCGAT<br/> CATATGGTTCTGCTGGAGTTCGTAACCGCAGCGGGCATCACGCATGGTATGGATGAACTGTACAAATAAGcacttttagcca<br/> acctaacgctcgtacagtagcggctgcacctaagaggagactctaactcctcaacagaaagctgcgctactcgtgctgcg<br/> aacagggccgataaaactggctgagtccaacaactaattgaaacccttgggtgcctactagtagcggccgctgcag</p>                                                  |
| pSBN    | <p>gaattcgcggccgcttctagagaagcctgtaggactaaactatcactatagggagaccaagagatgctctgaaatgaagagac<br/> tcaatgtttccctattacttcagtcacatacggattggcgctacagtaagtaataaactttatccttcaattgaataggagaat<br/> tagcatATGCGTAAAGGCGAAGAGCTGTTCACCTGGTGTCTGCCCTATTCTGGTGGAACTGGATGGTGTGTCACCGTCATAA<br/> GTTTTCCGTGCGTGGCGAGGGTGAAGGTGACGCAACTAATGGTAAACTGACGCTGAAGTTCATCTGTACTACTGGTAAACTGC<br/> CGGTACCTTGCCGACTCTGGTAACGACGCTGACTTATGGTGTTCAGTGTCTTGTCTGTTATCCGGACCATATGAAGCAGCAT<br/> GACTTCTTCAAGTCCGCCATGCCGGAAGGCTATGTGCAGGAACGCACGATTTCTTTAAGGATGACGGCAGCTACAAAACGCG<br/> TGCGGAAGTAAAATTTGAAGCGGATAACCCTGGTAAACCGCATTGAGCTGAAAGGCATTGACTTTAAAGAAGACGGCAATATCC<br/> TGGGCCATAAGCTGGAATACAATTTTAACAGCCACAATGTTTACATCACCGCCGATAAACAAAAAATGGCATTAAAGCGAAT<br/> TTTAAAATTCGCCACAACGTGGAGGATGGCAGCGTGCAGCTGGCTGATCACTACCAGCAAAACTCCAATCGGTGATGGTCC<br/> TGTTCTGCTGCCAGACAATCACTATCTGAGCAGCAAAGCGTTCTGTCTAAAGATCCGAACGAGAAACGCGATCATATGGTTC<br/> TGCTGGAGTTCGTAACCGCAGCGGGCATCACGCATGGTATGGATGAACTGTACAAAGGcGGTGGcGGTTCGGtGGcGGtGGc<br/> TCTGGcGGTGGcGGTTCatggcaaacggtccgggtcagaaaattggtacagaccaaggtaaaggcaaatccagctccgacgc<br/> tcttgctgttctcctgaaggtatggcgggtgaagtcctgaccgcattcactcgcgctctgtaactgctgacaagcatattg<br/> tctactagtagcggccgctgcag</p> |

pSBC3

gaattcgcggccgcttctagagggttttcagcccagcggagtaagcacttttagccaacctaacgtcgctacagtagcggctg  
cacctgaagaggagactctaactcctcaacagaaagctgcgcgctattcgtgctgcgaacagggccgataaactggctgagtcc  
aacaacGGcGGTGGcGGTTCTGGtGGcGGtGGcTCTGGcGGTGGcGGTTCTATGCGTAAAGGCGAAGAGCTGTTCACTGGTGT  
CGTCCCTATTCTGGTGGAACTGGATGGTGTGTCAACGGTCATAAGTTTTCCGTGCGTGGCGAGGGTGAAGGTGACGCAACTA  
ATGGTAAACTGACGCTGAAGTTCATCTGTACTACTGGTAAACTGCCGGTACCTTGGCCGACTCTGGTAACGACGCTGACTTAT  
GGTGTTCAGTGCTTTGCTCGTTATCCGGACCATATGAAGCAGCATGACTTCTTCAAGTCCGCCATGCCGGAAGGCTATGTGCA  
GGAACGCACGATTTCTTTAAGGATGACGGCACGTACAAAACGCGTGC GGAAGTGA AATTTGAAGGCGATACCCTGGTAAACC  
GCATTGAGCTGAAAGCATTGACTTTAAAGAAGACGGCAATATCCTGGGCCATAAGCTGGAATACAATTTAACAGCCACAAT  
GTTTACATCACCGCCGATAAACAAAAAATGGCATTAAAGCGAATTTAAAATTCGCCACAACGTGGAGGATGGCAGCGTGCA  
GCTGGCTGATCACTACCAGCAAAACACTCCAATCGGTGATGGTCTGTTCTGCTGCCAGACAATCACTATCTGAGCACGCAAA  
GCGTTCTGTCTAAAGATCCGAACGAGAAACGCGATCATATGGTTCTGCTGGAGTTCGTAACCGCAGCGGGCATCACGCATGGT  
ATGGATGAACTGTACAAAtaattgaaacccttgggtgccttcgggtgcttgaggggtttttgcttaaagtgagaggagactt  
atggctcaatacattccactgaatgctaacgatgacttagatgccatcaacgatatgtagctgctatcggtgaaccagcagt  
cctactagtagcggccgctgcag

**Table S2. List of oligonucleotides used in this study**

| primers used for plasmid construction: |                                     |                                                                               |
|----------------------------------------|-------------------------------------|-------------------------------------------------------------------------------|
| VF2                                    | tgccacctgacgtctaagaa                | pSB6A1 vector specific forward primer, flanking cloning site                  |
| VR                                     | attaccgcctttgagtgagc                | pSB6A1 vector specific reverse primer, flanking cloning site                  |
| GFPfw                                  | GTTCTGCTGGAGTTCGTAACC               | <i>gfp</i> gene, forward primer                                               |
| crRNA_g10FW                            | AAACagcggagtaagcacttttagccaacctaacG | spacer in plasmid pCas9g10                                                    |
| crRNA_g10Rev                           | AAAACgtaggttgctaaaagtcttactccgct    | spacer in plasmid pCas9g10 , reverse strand                                   |
| g10CHECKrev                            | ggctaaaagtcttactccgc                | insert-specific checking primer for cloning spacer in plasmid pCas9g10        |
| crRNA_K1FC/1fw                         | AAACgctgagccaacaactaattgaaacccttG   | spacer in plasmid pCas9K1FC1                                                  |
| crRNA_K1FC/1rev                        | AAAACaaggggttcaattagttgttgactcagc   | spacer in plasmid pCas9K1FC1 , reverse strand                                 |
| C1checkFW                              | acgctgagccaacaactaattg              | insert-specific checking primer for cloning spacer in plasmid pCas9K1FC1      |
| crRNA_K1FC/2fw                         | AAACgaagccaccaaggggttcaattagttgtG   | spacer in plasmid pCas9K1FC2                                                  |
| crRNA_K1FC/2rev                        | AAAACacaactaattgaaacccttgggtgccttc  | spacer in plasmid pCas9K1FC2 , reverse strand                                 |
| C2checkFW                              | aaaacgaagccaccaagg                  | insert-specific checking primer for cloning spacer in plasmid pCas9K1FC2      |
| pCASfor                                | CAGCTAGGAGGTGACTGAAG                | vector-specific forward checking primer for cloning spacers in pCas9 plasmids |
| pCASrev                                | GGACGATCACACTACTCTTC                | vector-specific reverse checking primer for cloning spacers in pCas9 plasmids |
| primers specific for K1F genome:       |                                     |                                                                               |
| g11rev                                 | GTGAAAGTGGTTGACTGAGTGG              | <i>gene11</i> reverse primer                                                  |
| g10fw                                  | GGCGACCGTTACTTCTACACC               | <i>gene10</i> forward primer                                                  |
| g9fw                                   | CAGACCGAAGCATTGAGCTCC               | <i>gene9</i> forward primer                                                   |
| AS054                                  | CCTGATTGTCGGTAAATACGCT              | <i>gene10</i> forward primer, 3' end                                          |

**Table S3. Recombinant phage constructs and the plasmids used to engineer them**

| <b>construct name</b> | <b>phage name</b>    | <b>donor plasmid</b> | <b>selection plasmid</b> | <b>pure clone accomplished</b> |
|-----------------------|----------------------|----------------------|--------------------------|--------------------------------|
| <i>g10::gfp</i>       | K1F <i>g10::gfp</i>  | pSBGFP               | pCas9g10                 | No                             |
| <i>gfp::g10</i>       | K1F <i>gfp::g10</i>  | pSBN                 | -                        | No                             |
| <i>g10b::gfp</i>      | K1F <i>g10b::gfp</i> | pSBC3                | pCas9K1FC1, pCas9K1FC2   | Yes                            |

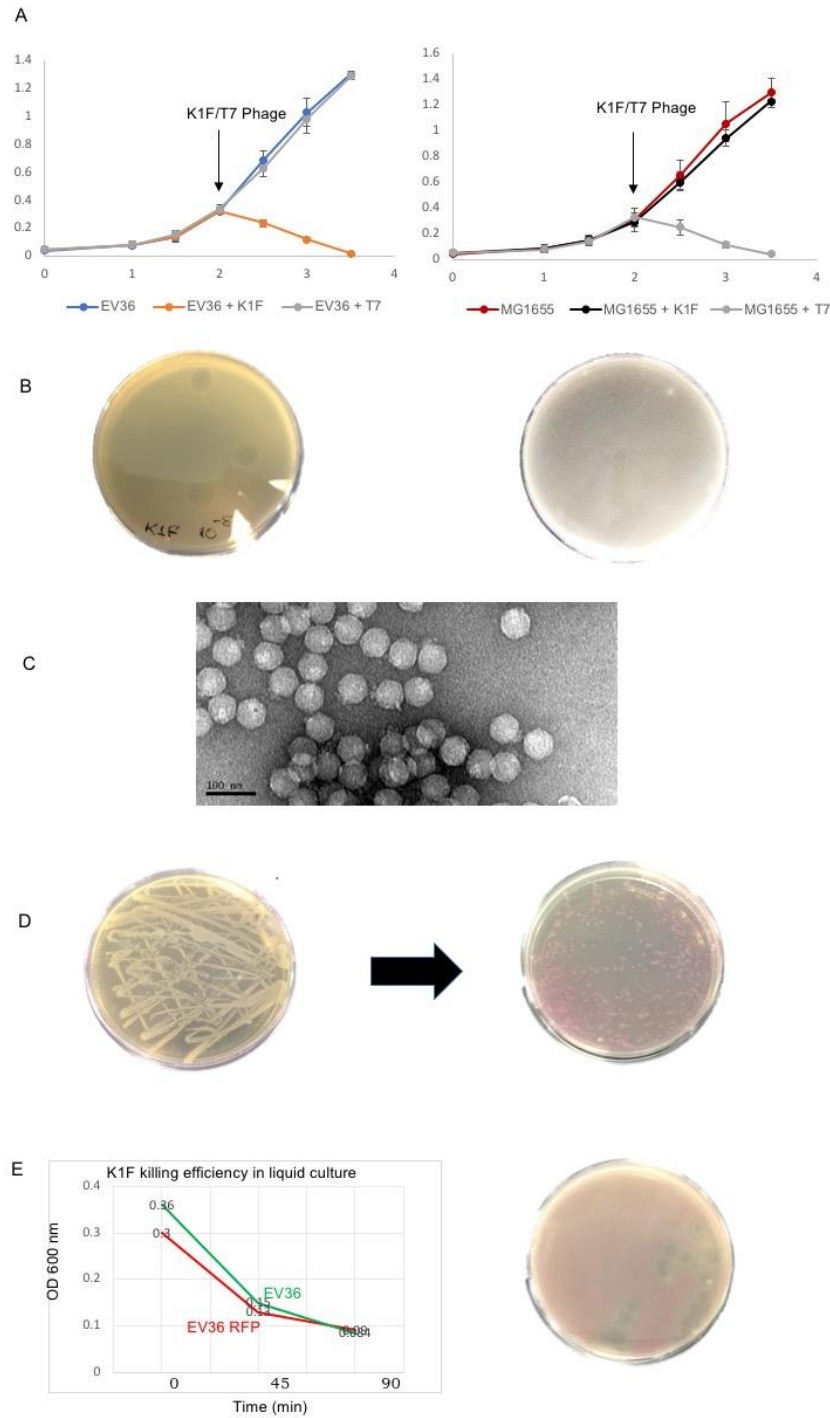

**Supplementary Figure S1.** Bacteriophage K1F is specific in targeting *E. coli* EV36. **A.** The optical density of bacterial liquid cultures was measured at 600 nm over a period of 3.5 hours. Phages were added to the *E. coli* cultures when they reached the exponential phase (2hrs) LEFT. Infection in *E. coli* EV36 liquid culture. The blue curve shows *E. coli* EV36 culture containing no phage. The orange and grey curves show cultures infected with phage K1F and

phage T7 respectively. **RIGHT.** Infection in *E. coli* MG1655 liquid culture. The red curve shows *E. coli* MG1655 culture containing no phage. The black and grey curves show cultures infected with phage K1F and phage T7 respectively. **B.** Clonal phage K1F was isolated from a single plaque. **LEFT.** Single plaques of phages K1F on a lawn of *E. coli* EV36. **RIGHT.** Phage K1F added onto *E. coli* MG1655 lawn and no plaques are present. **C.** Transmission electron microscopy imaging showing CsCl column purified K1F phages negatively stained with uranyl acetate. **D.** *E. coli* EV36 cells were made electrocompetent and they were transformed with a RFP plasmid (PSB6A1 from BioBrick collection) to obtain red colour and can be easily visualized by microscopy. **E.** Determination of phage K1F infection efficiency of *E. coli* EV36-RFP cells. **LEFT.** Optical density of liquid cultures was measured at 600 nm over a period of 90 minutes. The green and red curves show cultures of *E. coli* EV36 and *E. coli* EV36-RFP respectively. K1F phages were added to cultures at time zero. **RIGHT.** Plaque assay showing plaques of K1F at  $10^{-7}$  dilution on a lawn of *E. coli* EV36-RFP.

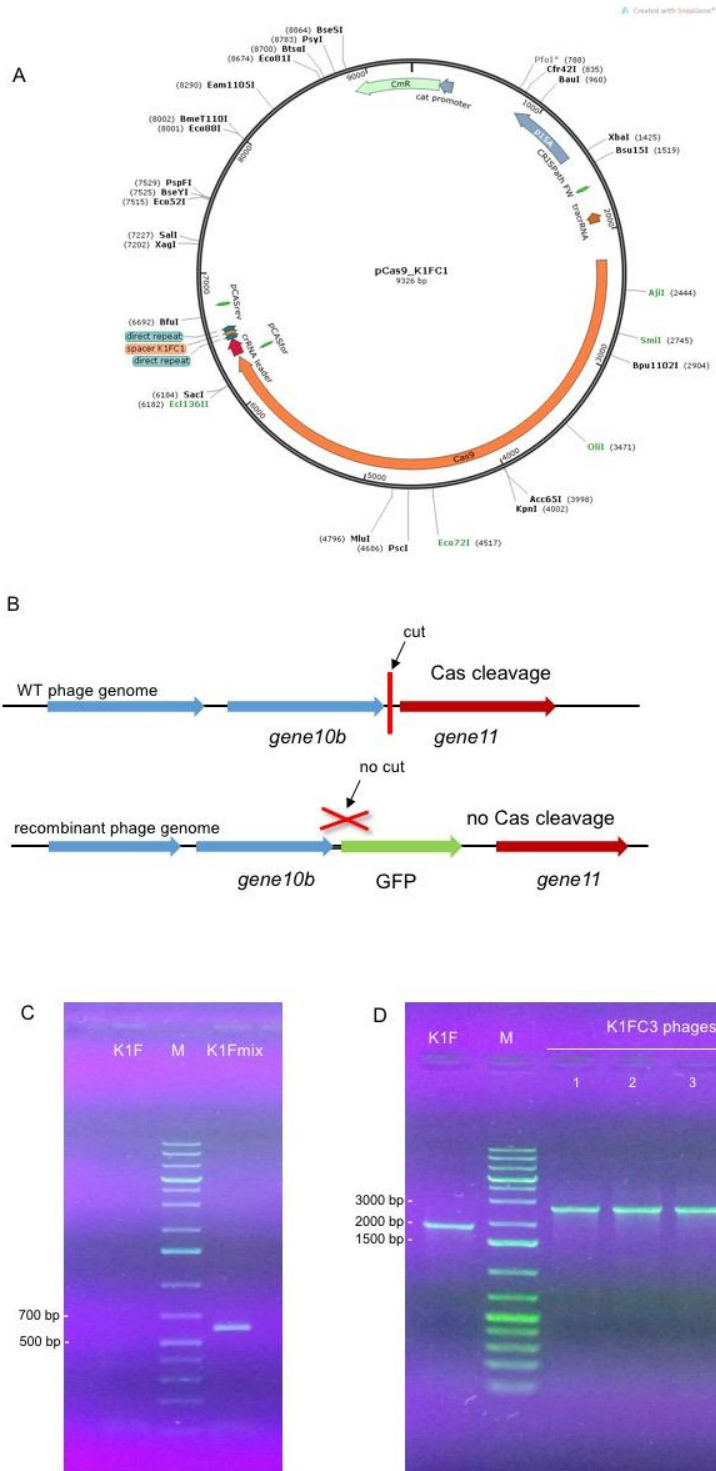

**Supplementary Figure S2.** CRISPR/Cas selection of fluorescent phage K1F. **A.** Map of plasmid pCas9K1FC1 used for CRISPR/Cas selection. Plasmid pCas9K1FC2 is identical except for the CRISPR-spacer sequence. **B.** Rationale of CRISPR/Cas selection applied on a phage mix. The crRNA of the CRISPR/Cas system is engineered such as to



cleave wild type sequences, but leave the recombinant construct intact, thereby enriching recombinant bacteriophages. **C.** The PCR product obtained with primers GFPfw and g11rev demonstrates the presence of *g10::gfp* within a phage mix obtained by phage growth on bacteria harbouring the appropriate donor plasmid. **D.** In a parallel effort to engineer *g10b::gfp*, the phage mix obtained likewise was exposed to *in vivo* CRISPR/Cas selection permitting the isolation of pure recombinant plaques displaying an elongated g9fw-g11rev PCR product, marking the integration of the GFP gene. M: GeneRuler 1 kb Plus DNA Ladder.

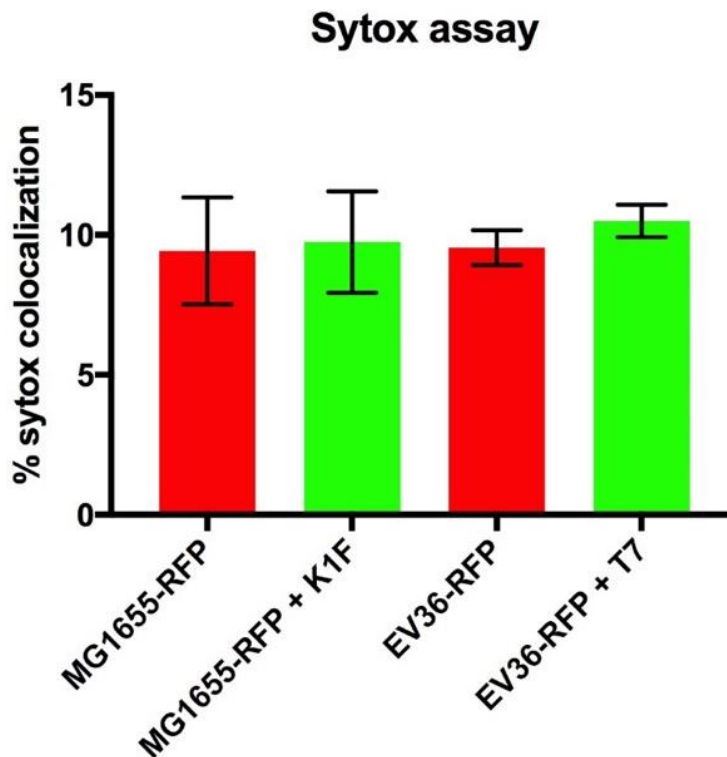

**Supplementary Figure S3.** SYTOX Bacterial Death Assay control bacteriophage-host pairs. Graph shows the average percentage of colocalisation of RFP-tagged bacteria and SYTOX DNA stain over three biological replicates +/- standard deviation. No statistical difference was observed. **LEFT.** The validity of the assay and the specificity of phage K1F was challenged using *E. coli* MG1655-RFP, a host that does not express the K1 capsid. **RIGHT.** The susceptibility of *E. coli* EV36-RFP was challenged using phage T7, a pathogen that does not naturally infect K1 expressing hosts.

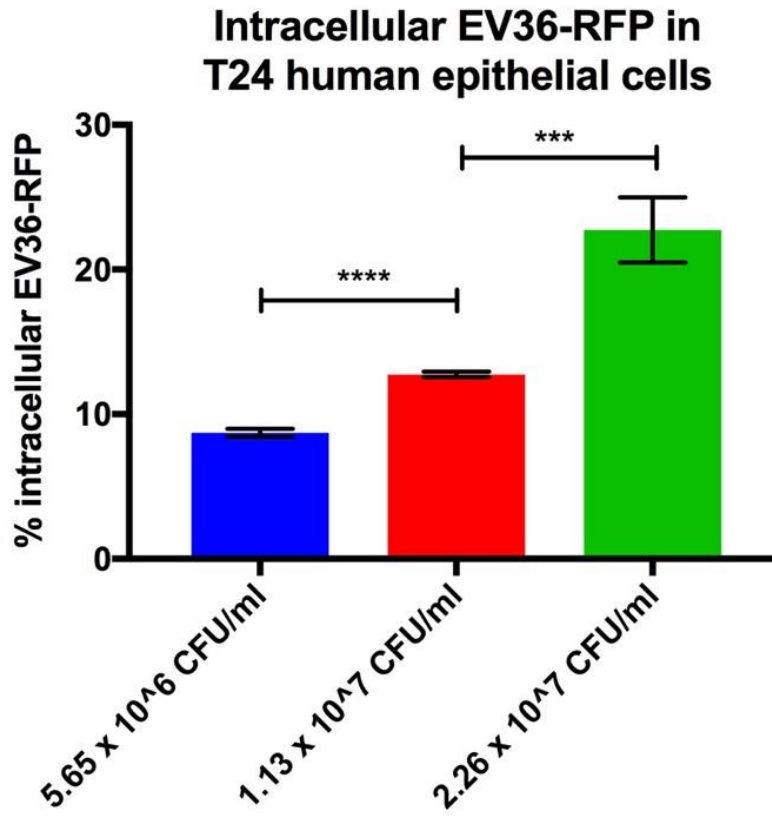

**Supplementary Figure S4.** *E. coli* EV36-RFP concentration dependent invasion in T24 cells. Human bladder epithelial T24 cells were incubated with *E. coli* EV36-RFP for two hours at final CFU/ml concentrations of  $5.65 \times 10^6$ ,  $1.13 \times 10^7$  and  $2.26 \times 10^7$ . The fixed cells were imaged and prevalence of T24 cells with intracellular *E. coli* EV36-RFP was quantified as a percentage of the total T24 cell population. A representative graph of an experiment performed in biological triplicates is shown here as the average  $\pm$  standard deviation as error bars. P-values are displayed as  $p \leq 0.05$  (\*),  $p \leq 0.01$  (\*\*),  $p \leq 0.001$  (\*\*\*),  $p \leq 0.0001$  (\*\*\*\*) and not statistical significant  $p \geq 0.05$  (ns). The p-value between CFU/ml  $5.65 \times 10^6$  and  $1.13 \times 10^7$  is  $3.14 \times 10^{-5}$ , and between CFU/ml  $1.13 \times 10^7$  and  $2.26 \times 10^7$  is  $1.56 \times 10^{-3}$ .

A

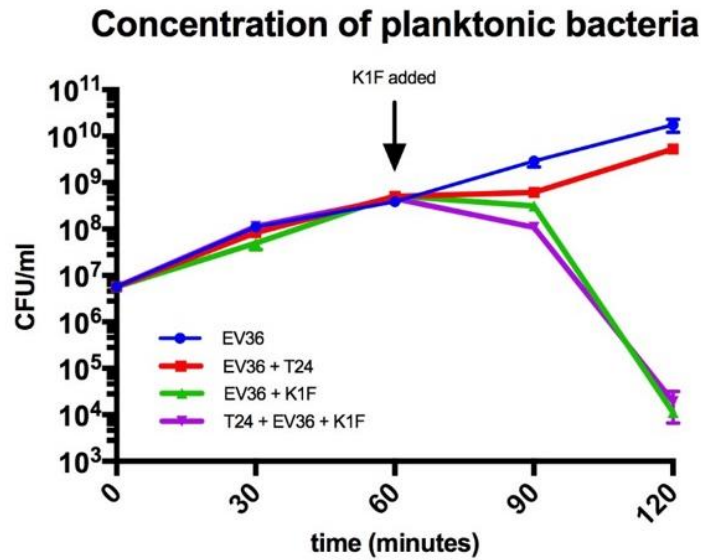

B

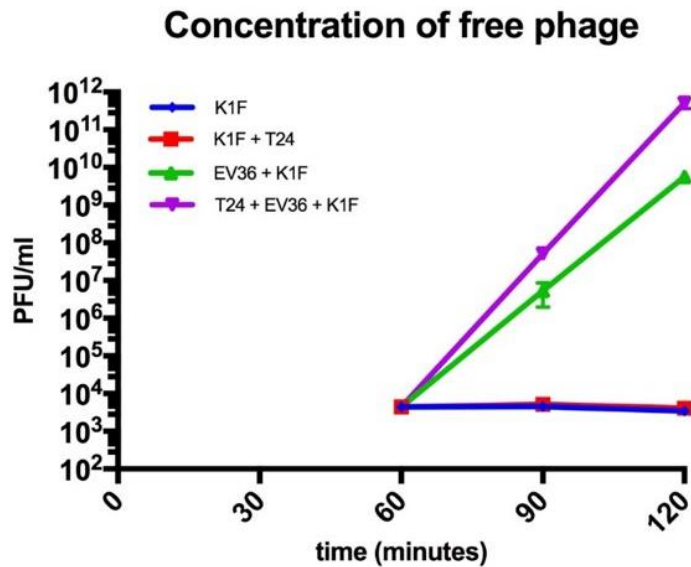

**Supplementary Figure S5.** Time course measurements of planktonic bacteria and free phages. A representative graph of an experiment performed in biological triplicates is shown here as the average  $\pm$  standard deviation as error bars. **A.** Measured concentration of planktonic *E. coli* EV36 as illustrated by CFU/ml over a two-hour time course. Bacteriophage K1F was added after one hour to corresponding wells. **B.** Measured concentration of free bacteriophage K1F as illustrated by PFU/ml over a two-hour time course.

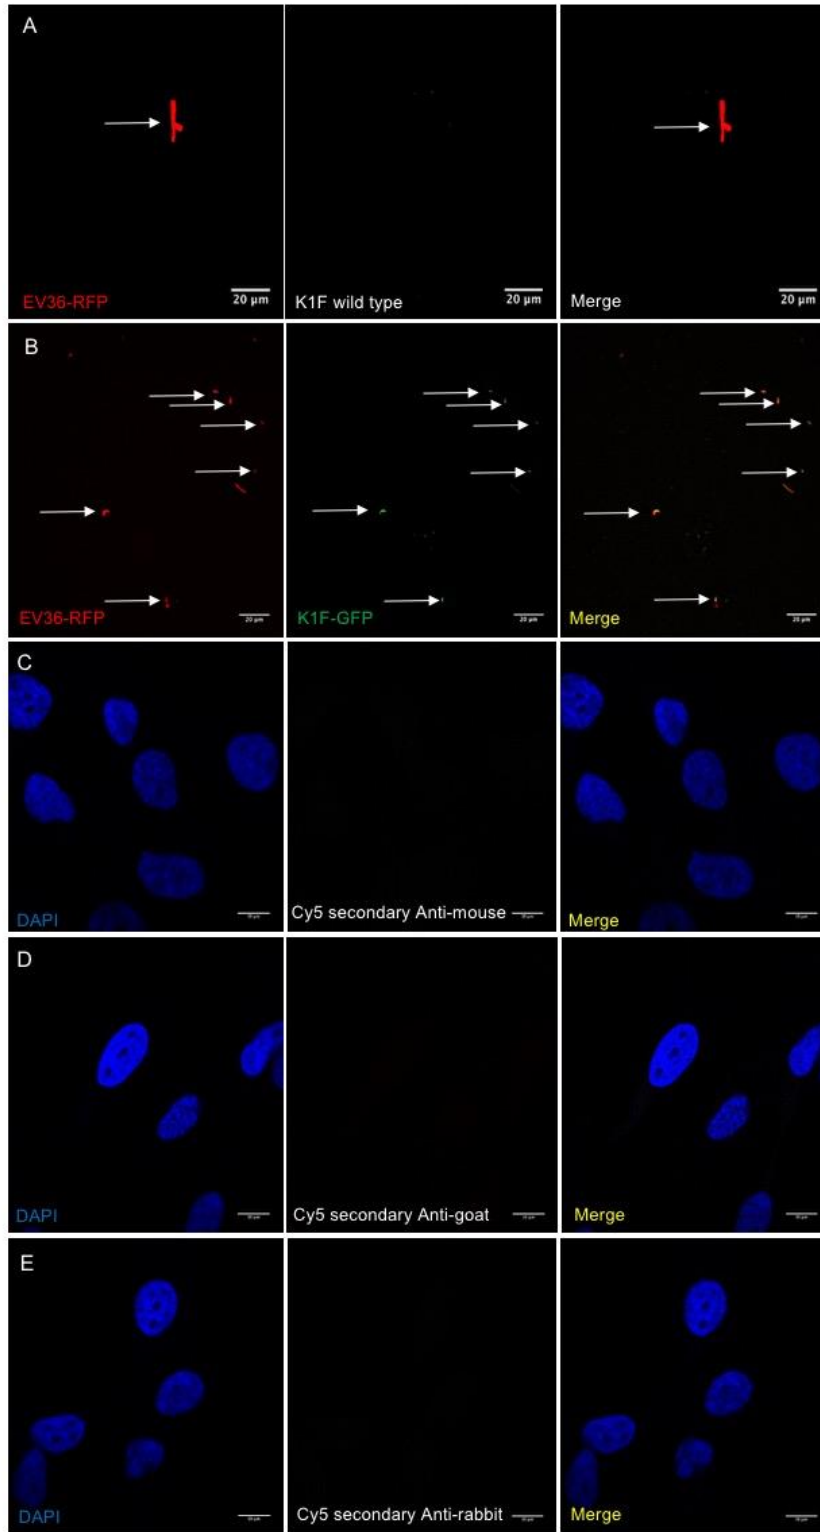

**Supplementary Figure S6.** Negative controls for phage K1F-GFP signal and co-localization assays. **A-B.** Imaging of fixed T24 cells for comparison of phage K1F wild type and phage K1F-GFP. *E.coli* EV36-RFP incubated with either bacteriophage prior to fixation. **(A)** Showing phage K1F wild type infection of *E.coli* EV36-RFP. No fluorescent signal is observed from phage K1F wild type. **(B).** Showing phage K1F-GFP infection of *E.coli* EV36-RFP, where the fluorescent signal is clearly visible (arrows). **C-E.** Negative controls for co-localization assays. Each secondary antibody used was incubated individually on fixed T24 cells and mounted with a DAPI containing medium on microscope slides. Each horizontal panel shows a representative image of each channel captured (405nm, 633nm) and merged. **C.** Goat anti-Mouse IgG (H+L) Cross-Adsorbed Secondary Antibody, Alexa Fluor 647 (Invitrogen) **D.** Cy-5 conjugated AffiniPure donkey anti-goat IgG (H+L) (Jackson ImmunoResearch) **E.** Cy-5 conjugated AffiniPure goat anti-rabbit IgG (H+L).

A

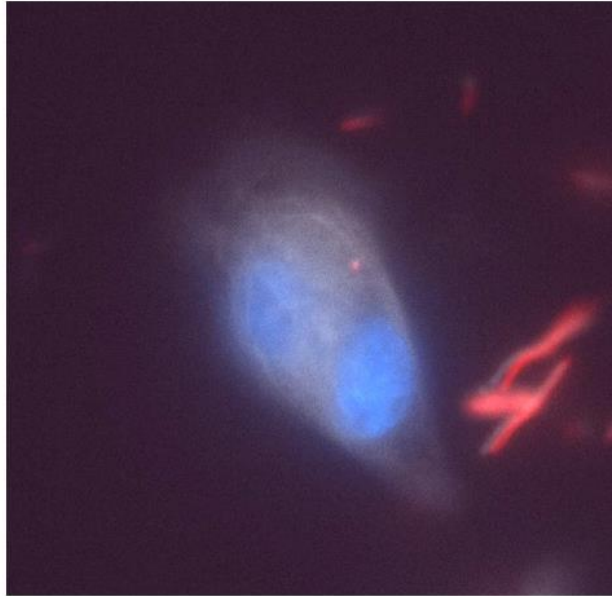

B

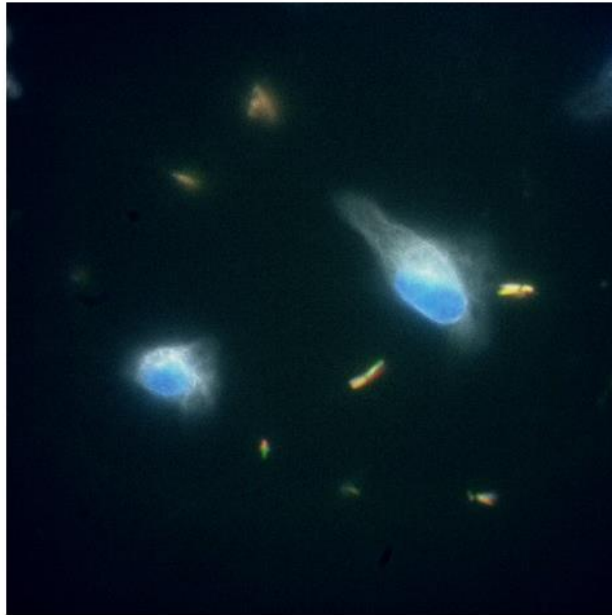

**Supplementary Figure S7.** Time-lapse live microscopy of epithelial human cells invaded by *E. coli* EV36 and incubated with fluorescent bacteriophage K1F. **A.** T24 epithelial human cells were incubated for 1 h with *E. coli* EV36-RFP bacteria grown to OD<sub>600</sub> of 0.2, with further filming for 1 h (pictures were taken every 10 seconds). **B.** T24 epithelial human cells were incubated for 1 h with *E. coli* EV36-RFP bacteria grown to OD<sub>600</sub> of 0.2. Fluorescent bacteriophage K1F was added and was incubated for 20 minutes, followed by 20 minutes filming (pictures were taken every 10 seconds). In both **A** and **B**, human cells were stained with SiR-tubulin reagent for live microtubules and NucBlue Live ReadyProbes Reagent, for the nuclear staining.

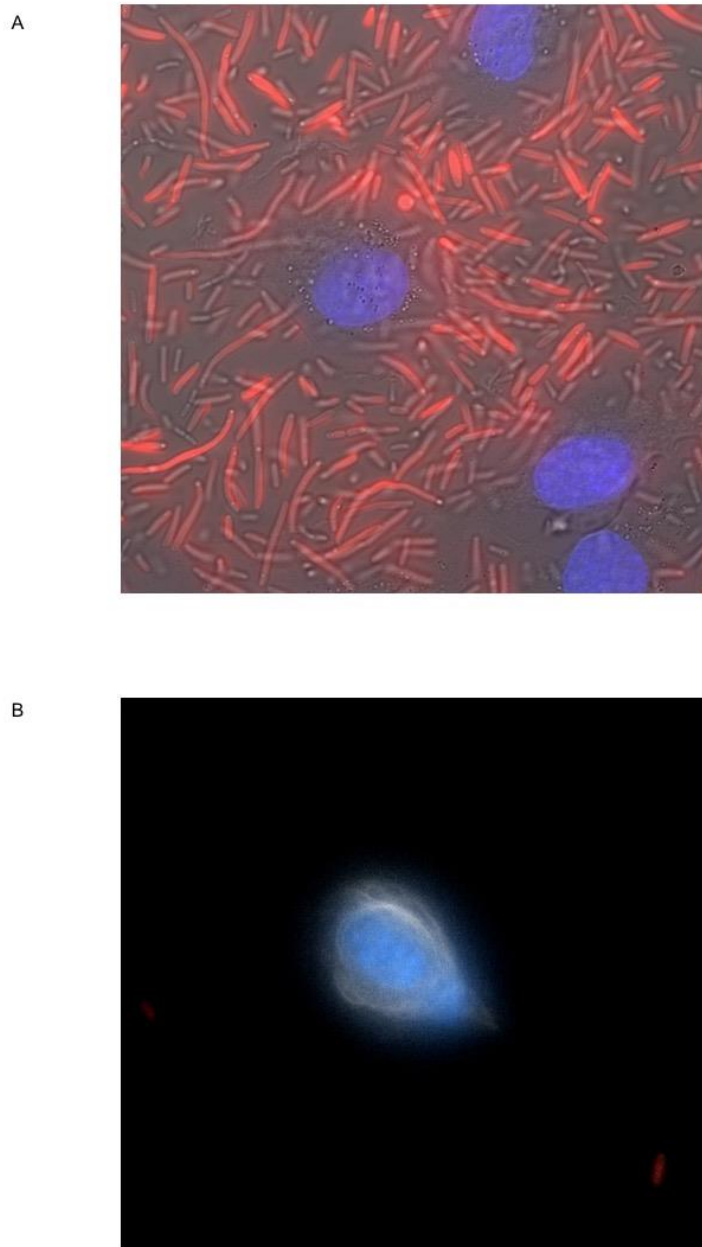

**Supplementary Figure S8.** Time-lapse live microscopy of bacteriophage K1F clearing *E. coli* EV36 bacterial infection in epithelial human cellular environment. **A.** T24 epithelial human cells were incubated for 3 h with *E. coli* EV36-RFP bacteria grown to  $OD_{600}$  of 0.6, with further filming for 2 h (pictures were taken every 1 min). **B.** T24 epithelial human cells were incubated for 1 h with *E. coli* EV36-RFP bacteria grown to  $OD_{600}$  of 0.2. Bacteriophage K1F was added and was incubated for 45 minutes, followed by 1 h filming (pictures were taken every 10 seconds). In both **A** and **B**, human cells were stained with NucBlue Live ReadyProbes Reagent, for the nuclear staining. In **B**, human cells were stained also with SiR-tubulin reagent for live microtubules.

Uncropped gels

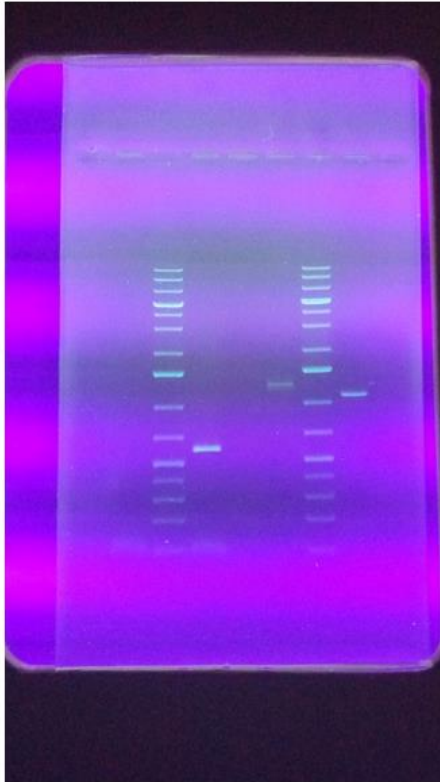

Uncropped gel Supplementary  
Fig. 2C

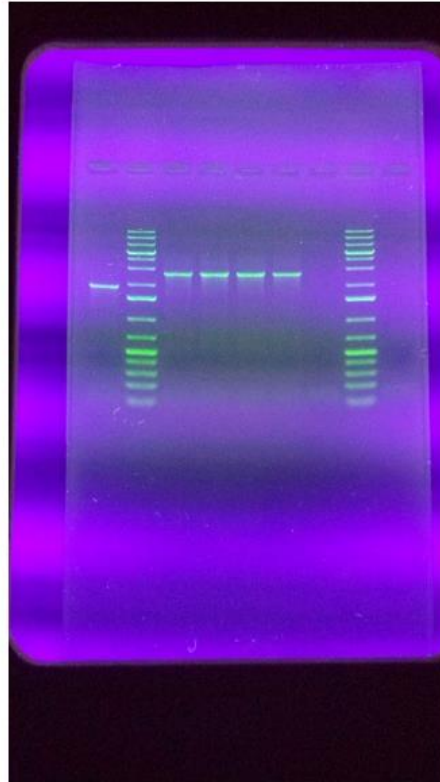

Uncropped gel Supplementary  
Fig. 2D
